# Supplementary material for: Factors Influencing Patient-Reported Symptom Outcomes in Women with Metastatic Breast Cancer
Source: Research Square preprint supplement (doi:10.21203/rs.3.rs-7328394/v1), 2025-10-09
Supplement: Supplementary file 1 [file 2cdc2d36a91f0ec52420dcb3.docx]

| **Supplemental Tabel 1.** Percentage of Moderate to Severe Symptoms by Cancer Treatment | | | | | | | | | | |
| --- | --- | --- | --- | --- | --- | --- | --- | --- | --- | --- |
| **MDASI** | **Total Sample**  Moderate-to-severe symptom ≥5 | | **Current Cancer Treatment** | | | | | | |  |
| **Chemo/Chemo+**  **Targeted or immune** | | **Hormone/Hormone+**  **targeted or immune** | | | **Targeted** | | P-values |
|  | N | % | N | % | N | | % | N | % |  |
| **Core Symptoms** |  |  |  |  |  |  | |  |  |  |
| Pain | 92 | 44.9 | 40 | 50.6 | 41 | 44.6 | | 11 | 32.4 | 0.20 |
| Fatigue | 137 | 66.8 | 59 | 74.7 | 61 | 66.3 | | 17 | 50.0 | 0.04 |
| Nausea | 64 | 31.2 | 31 | 39.2 | 26 | 28.3 | | 7 | 20.6 | 0.10 |
| Disturbed sleep | 114 | 55.6 | 55 | 69.6 | 47 | 51.1 | | 12 | 35.3 | 0.00 |
| Distressed | 95 | 46.3 | 39 | 49.4 | 43 | 46.7 | | 13 | 38.2 | 0.55 |
| Shortness of breath | 49 | 23.9 | 29 | 36.7 | 15 | 16.3 | | 5 | 14.7 | 0.03 |
| Forgetfulness | 95 | 46.3 | 43 | 54.4 | 40 | 43.5 | | 12 | 35.3 | 0.13 |
| Lack of appetite | 58 | 28.3 | 32 | 40.5 | 22 | 23.9 | | 4 | 11.8 | 0.04 |
| Drowsy | 111 | 54.1 | 49 | 62.0 | 50 | 54.3 | | 12 | 35.3 | 0.03 |
| Dry mouth | 70 | 34.1 | 37 | 46.8 | 25 | 27.2 | | 8 | 23.5 | 0.01 |
| Sadness | 96 | 46.8 | 44 | 55.7 | 41 | 44.6 | | 11 | 32.4 | 0.06 |
| Vomiting | 35 | 17.1 | 20 | 25.3 | 13 | 14.1 | | 2 | 5.9 | 0.02 |
| Numbness | 70 | 34.1 | 36 | 45.6 | 27 | 29.3 | | 7 | 20.6 | 0.02 |
|  |  |  |  |  |  |  | |  |  |  |
| **Immunotherapy module** |  |  |  |  |  |  | |  |  |  |
| Diarrhea | 58 | 28.3 | 29 | 36.7 | 27 | 29.3 | | 2 | 5.9 | 0.00 |
| Abdomen pain | 57 | 27.8 | 32 | 40.5 | 20 | 21.7 | | 5 | 14.7 | 0.00 |
| Swelling of hands, legs or feet | 49 | 23.9 | 27 | 34.2 | 19 | 20.7 | | 3 | 8.8 | 0.01 |
| Rash or skin change | 50 | 24.4 | 24 | 30.4 | 22 | 23.9 | | 4 | 11.8 | 0.11 |
| Headache | 59 | 28.8 | 33 | 41.8 | 19 | 20.7 | | 7 | 20.6 | 0.01 |
| Night sweats | 61 | 29.8 | 24 | 30.4 | 32 | 34.8 | | 5 | 14.7 | 0.08 |
| Fever or chills | 37 | 18.0 | 21 | 26.6 | 13 | 14.1 | | 3 | 8.8 | 0.04 |
|  |  |  |  |  |  |  | |  |  |  |
| **Symptom Interference** |  |  |  |  |  |  | |  |  |  |
| General activity | 90 | 43.9 | 40 | 50.6 | 41 | 44.6 | | 9 | 26.5 | 0.06 |
| Mood | 91 | 44.4 | 40 | 50.6 | 42 | 45.7 | | 9 | 26.5 | 0.05 |
| Work | 92 | 44.9 | 46 | 58.2 | 35 | 38.0 | | 11 | 32.4 | 0.01 |
| Relationships/interaction with others | 84 | 41.0 | 39 | 49.4 | 35 | 38.0 | | 10 | 29.4 | 0.11 |
| Walking | 77 | 37.6 | 38 | 48.1 | 31 | 33.7 | | 8 | 23.5 | 0.03 |
| Enjoyment of life | 89 | 43.4 | 42 | 53.2 | 36 | 39.1 | | 11 | 32.4 | 0.07 |

| **Supplemental Table 2.** Univariate Analyses of Sociodemographic and Clinical Factors with Symptom Outcomes (N=198) | | | | | | | | | |
| --- | --- | --- | --- | --- | --- | --- | --- | --- | --- |
|  | **Symptom Severity** | | | **Symptom Interference** | | | **Symptom Burden** | | |
| Variables | Estimate (*b*) | 95% CI | *P* | Estimate (*b*) | 95% CI | *P* | Estimate (*b*) | 95% CI | *P* |
| Age | -0.06 | <0.001 | <0.001 | -0.05 | (-0.07, -0.02) | <0.001 | -0.11 | (-0.15, -0.06) | <0.001 |
| Race |  |  | <0.001 |  |  | <0.001 |  |  |  |
| White | ref | - |  | ref | - |  | ref | - | <0.001 |
| Non-white | 2.00 | (1.34, 2.66) |  | 2.09 | (1.27, 2.92) |  | 4.09 | (2.68, 5.50) |  |
| Ethnicity |  |  | <0.001 |  |  | <0.001 |  |  |  |
| Non-Hispanic | ref | - |  | ref | - |  | ref | - | <0.001 |
| Hispanic | 2.27 | (1.37, 3.16) |  | 1.97 | (0.84, 3.10) |  | 4.24 | (2.31, 6.16) |  |
| Marital Status |  |  | 0.531 |  |  | 0.268 |  |  | 0.339 |
| Married/Cohabitating | ref | - |  | ref | - |  | ref | - |  |
| Divorced/Separated | -0.07 | (-0.89, 0.75) |  | 0.11 | (-0.89, 1.11) |  | 0.04 | (-1.70, 1.78) |  |
| Never Married | 0.44 | (-0.70, 1.58) |  | 0.79 | (-0.60, 2.18) |  | 1.23 | (-1.18, 3.64) |  |
| Widowed | -0.84 | (-2.21, 0.54) |  | -1.30 | (-2.98, 0.37) |  | -2.14 | (-5.05, 0.77) |  |
| Educational Level |  |  | 0.002 |  |  | 0.024 |  |  | 0.005 |
| High school graduate/some college | ref | - |  | ref | - |  | ref | - |  |
| College or above | -1.19 | (-1.93, -0.46) |  | -1.06 | (-1.97, -0.14) |  | -2.25 | (-3.83, -0.67) |  |
| Employment Status |  |  | 0.860 |  |  | 0.195 |  |  | 0.501 |
| Unemployed/Retired/Disabled | ref | - |  | ref | - |  | ref | - |  |
| Employed full-time | 0.07 | (-0.59, 0.74) |  | -0.49 | (-1.31, 0.32) |  | -0.42 | (-1.84, 0.99) |  |
| Employed part-time/self-employed | -0.18 | (-1.03, 0.67) |  | -0.88 | (-1.91, 0.16) |  | -1.05 | (-2.86, 0.75) |  |
| Household Annual Income |  |  | 0.048 |  |  | 0.002 |  |  | 0.007 |
| <$50,000 | ref | - |  | ref | - |  | ref | - |  |
| $50,000 - $100,000 | -0.38 | (-1.23, 0.47) |  | -1.05 | (-2.07, -0.02) |  | -1.43 | (-3.21, 0.36) |  |
| $101,000 - $150,000 | -0.31 | (-1.22, 0.60) |  | -0.73 | (-1.83, 0.36) |  | -1.04 | (-2.95, 0.86) |  |
| >$150,000 | -1.23 | (-2.16, -0.30) |  | -2.12 | (-3.24, -0.99) |  | -3.35 | (-5.30, -1.40) |  |
| Insurance |  |  | <0.001 |  |  | 0.002 |  |  | <0.001 |
| Medicare/Medicaid | ref | - |  | ref | - |  | ref | - |  |
| Private insurance/Marketplace | -1.55 | (-2.27, -0.84) |  | -1.57 | (-2.46, -0.68) |  | -3.12 | (-4.65, -1.60) |  |
| Other | -0.74 | (-1.50, 0.02) |  | -0.57 | (-1.51, 0.38) |  | -1.31 | (-2.93, 0.31) |  |
| Religion |  |  | 0.009 |  |  | 0.024 |  |  | 0.013 |
| No | ref | - |  | ref | - |  | ref | - |  |
| Yes | 0.81 | (0.18, 1.43) |  | 0.88 | (0.11, 1.65) |  | 1.69 | (0.36, 3.02) |  |
| Dependent Children |  |  | <0.001 |  |  | 0.001 |  |  | <0.001 |
| No | ref | - |  | ref | - |  | ref | - |  |
| Yes | 1.32 | (0.75, 1.88) |  | 1.19 | (0.48, 1.91) |  | 2.51 | (1.29, 3.73) |  |
| Hormone receptor status |  |  | 0.547 |  |  | 0.699 |  |  | 0.951 |
| Negative | ref | - |  | ref | - |  | ref | - |  |
| Positive | -0.24 | (-1.03, 0.55) |  | 0.19 | (-0.78, 1.16) |  | -0.05 | (-1.73, 1.63) |  |
| HER-2 status |  |  | 0.606 |  |  | 0.522 |  |  | 0.899 |
| Negative | ref | - |  | ref | - |  | ref | - |  |
| Positive | 0.18 | (-0.49, 0.84) |  | -0.27 | (-1.09, 0.55) |  | -0.09 | (-1.51, 1.33) |  |
| Tumor Characteristics |  |  | 0.898 |  |  | 0.918 |  |  | 0.988 |
| HR+/HER2- | ref | - |  | ref | - |  | ref | - |  |
| HR+/HER2+ | 0.19 | (-0.63, 1.01) |  | -0.18 | (-1.18, 0.83) |  | 0.01 | (-1.73, 1.76) |  |
| HR-/HER2+ | 0.24 | (-0.75, 1.23) |  | -0.40 | (-1.61, 0.82) |  | -0.16 | (-2.27, 1.94) |  |
| HR-/HER2- | 0.35 | (-0.87, 1.58) |  | 0.05 | (-1.45, 1.55) |  | 0.40 | (-2.20, 3.01) |  |
| Current treatment(s) |  |  | <0.001 |  |  | 0.008 |  |  | <0.001 |
| Chemo/chemo + targeted or immunotherapy | ref | - |  | ref | - |  | ref | - |  |
| Hormone/hormonal + targeted or immunotherapy | -0.88 | (-1.51, -0.26) |  | -0.73 | (-1.52, 0.05) |  | -1.62 | (-2.96, -0.28) |  |
| Targeted alone | -1.84 | (-2.68, -0.99) |  | -1.65 | (-2.71, -0.59) |  | -3.48 | (-5.29, -1.67) |  |
| Treatment(s) modalities |  |  | <0.001 |  |  | 0.020 |  |  | 0.003 |
| Oral pills | ref | - |  | ref | - |  | ref | - |  |
| Intravenous (IV) treatment | -0.16 | (-0.97, 0.65) |  | -0.04 | (-1.04, 0.97) |  | -0.20 | (-1.92, 1.53) |  |
| Both oral and IV | 1.83 | (0.89, 2.76) |  | 1.80 | (0.63, 2.97) |  | 3.63 | (1.62, 5.63) |  |
| Injection | -0.39 | (-2.47, 1.69) |  | 1.27 | (-1.33, 3.87) |  | 0.88 | (-3.57, 5.34) |  |
| More than one modality | 0.63 | (-0.09, 1.36) |  | 0.71 | (-0.19, 1.62) |  | 1.35 | (-0.20, 2.90) |  |
| Time on the current treatment(s) |  |  | 0.161 |  |  | 0.013 |  |  | 0.035 |
| < 1 year | ref | - |  | ref | - |  | ref | - |  |
| 1-4 years | 0.54 | (-0.10, 1.17) |  | 1.11 | (0.35, 1.88) |  | 1.65 | (0.32, 2.98) |  |
| More than 5 years | -0.16 | (-1.13, 0.80) |  | 0.12 | (-1.04, 1.29) |  | -0.04 | (-2.07, 1.99) |  |
| Palliative care enrollment |  |  | <0.001 |  |  | <0.001 |  |  | <0.001 |
| No | ref | - |  | ref | - |  | ref | - |  |
| Yes | 1.06 | (0.48, 1.64) |  | 1.23 | (0.51, 1.95) |  | 2.29 | (1.05, 3.53) |  |
| Clinical trial(s) enrollment |  |  | <0.001 |  |  | 0.073 |  |  | 0.007 |
| No | ref | - |  | ref | - |  | ref | - |  |
| Yes | 1.19 | (0.53, 1.84) |  | 0.75 | (-0.07, 1.58) |  | 1.94 | (0.53, 3.35) |  |
| Number of treatment line(s) completed | 0.28 | (0.12, 0.44) | <0.001 | 0.34 | (0.14, 0.54) | <0.001 | 0.62 | (0.27, 0.96) | <0.001 |
| Time science MBC diagnosis (in years) | -0.03 | (-0.10, 0.05) | 0.455 | -0.01 | (-0.10, 0.09) | 0.932 | -0.03 | (-0.19, 0.13) | 0.688 |
| Note: 95% CI= 95% confidence interval; participants who do not know their ethnicity (n=7) and treatment (n=4) were excluded from the analysis | | | | | | | | | |
